# Supplementary material for: Long-term safety and efficacy of lentiviral hematopoietic stem/progenitor cell gene therapy for Wiskott–Aldrich syndrome
Source: PubMed Central journal article supplement (PMC8799465; doi:10.1038/s41591-021-01641-x), 2022-01-24
Supplement: 41591_2021_1641_MOESM1_ESM.pdf [file 41591_2021_1641_MOESM1_ESM.pdf]

**Supplementary information**

---

**Long-term safety and efficacy of lentiviral hematopoietic stem/progenitor cell gene therapy for Wiskott–Aldrich syndrome**

---

In the format provided by the authors and unedited

**Supplementary Table 1.** Characteristics of the patients before and after GT, and characteristics of the infused gene-corrected autologous cell product

| Patient ID | Age at the time of gene therapy | Clinical status before GT                                                                                    | Clinical score before GT | WAS gene mutation                                                   | Presence of revertant cells / expression of mutated WASp <sup>a</sup> | Origin of HSCs | Dose of CD34+ cells (x 10 <sup>6</sup> /kg) | VCN in the transduced CD34+ cells | Follow-up (months) | Clinical status after treatment                                                                                                             |
|------------|---------------------------------|--------------------------------------------------------------------------------------------------------------|--------------------------|---------------------------------------------------------------------|-----------------------------------------------------------------------|----------------|---------------------------------------------|-----------------------------------|--------------------|---------------------------------------------------------------------------------------------------------------------------------------------|
| P1         | 10 y                            | Thrombocytopenia, Pjp, molluscum, moderate diffuse eczema, arthropathy, renal disease, recurrent infections  | 5                        | 401C>T; Ala134Val                                                   | -/+                                                                   | BM             | 2                                           | 0.7                               | 109                | A&W, eczema and infections resolved, reduced AI complications, splenectomy 3 y post-GT for ongoing thrombocytopenia, steroids for scleritis |
| P2         | 15.5 y                          | Thrombocytopenia, eczema, autoimmunity, severe vasculitis, unable to walk, splenectomized                    | 5                        | c.1453+1 G>C                                                        | +/-                                                                   | mPB            | 11                                          | 1.3                               | 106                | A&W, eczema and infections resolved, improvement of vasculitis, normal physical activity                                                    |
| P4         | 10 mo                           | Profound refractory thrombocytopenia, eczema                                                                 | 5                        | c.1295delG, p.G432EfsX13                                            | -/-                                                                   | BM             | 7.3                                         | 2.8                               | 96                 | A&W, eczema and infections resolved, one episode of arthritis, bleeding resolved                                                            |
| P5         | 3 y                             | Profound refractory thrombocytopenia, severe bleeding, eczema                                                | 5                        | c.257G>A, p.R86H                                                    | -/-                                                                   | BM             | 6.8                                         | 0.6                               | 94                 | A&W, eczema and infections resolved, no major bleeding, on eltrombopag (family decision)                                                    |
| P6         | 7 y                             | Recurrent epistaxis, eczema, recurrent infections                                                            | 3                        | 100C>T; Arg34X                                                      | +/-                                                                   | BM             | 3.1                                         | 1.7                               | 89                 | A&W, eczema and infections resolved, occasional petechiae                                                                                   |
| P7         | 3.5 y                           | Severe thrombocytopenia, mild skin vasculitis                                                                | 5                        | 1271dup(ex10) Leu425Profsx70                                        | -/+                                                                   | mPB            | 15                                          | 0.6                               | 75                 | A&W, eczema resolved, frequent bruises, on romiplostim                                                                                      |
| P8         | 30 y                            | Cutaneous vasculitis, arthropathy, lymphoproliferation, chronic kidney disease, IS treatment, splenectomized | 5                        | c.931+2T>C                                                          | -/-                                                                   | mPB            | 3.3                                         | 0,8                               | 48                 | Reduced AI/inflammation and infections, off IS, remained on colchicine; died 4 y post-GT from pneumococcal sepsis and H1N1 influenza        |
| P9         | 11 mo                           | GI bleeding, severe eczema, severe infections, CMV viremia, failure to thrive                                | 5                        | c.913 C>T p. (Gln305*) homozygote c.391G>A p. (Glu131Lys) hemizygot | -/-                                                                   | mPB            | 12.3                                        | 1,02                              | 52.1               | A&W, glomerulonephritis, nephrotic syndrome, eczema resolved, discontinued Ig replacement therapy, on MMF                                   |

Abbreviations: WAS, Wiskott-Aldrich syndrome; WASp, Wiskott-Aldrich syndrome protein; y, years; mo, months; HSC, hematopoietic stem cell; VCN, vector copy number; BM, bone marrow; mPB, mobilized peripheral blood; AI, autoimmunity; IS, immunosuppressants; Pjp, *Pneumocystis jiroveci* pneumonia; GI, gastro-intestinal; CMV, cytomegalovirus; A&W, alive and well; Ig, immunoglobulin; MMF, mofetil mycophenolate

<sup>a</sup> Plus or minus signs indicate that revertant cells or mutant protein were either present and detectable (plus) or absent and not detectable (minus)

**Supplementary Table 2.** Immune response after vaccination.

| <b>Patient ID</b> | <b>Vaccine</b>                           | <b>Ig titer</b>                                     | <b>Reference values</b> |
|-------------------|------------------------------------------|-----------------------------------------------------|-------------------------|
| P4                | Pneumococcus<br>B Hepatitis              | 2.03<br>410                                         | >1<br>>10               |
| P5                | Measles<br>Poliovirus 1/2<br>Chicken pox | 276<br>15/30<br>1302                                | >16.5<br>>5<br>>150     |
| P8                | Pneumococcus<br>Tetanus toxoid           | Protective responses<br>against 3/13 serotypes<br>4 | >150                    |

**Supplementary Table 3.** Circulating autoantibodies detected before and after GT.

|                                       | Patient 2                            |     |                  | Patient 4         |                             |                             |     | Patient 5         |     | Patient 7         |     |                  |
|---------------------------------------|--------------------------------------|-----|------------------|-------------------|-----------------------------|-----------------------------|-----|-------------------|-----|-------------------|-----|------------------|
|                                       | Pre-GT                               | 4 y | 6 y              | Pre-GT            | 3 y                         | 5 y                         | 6 y | Pre-GT            | 6 y | Pre-GT            | 2 y | 4 y              |
| <b>Anti-DNA</b>                       | neg                                  | neg | neg              | neg               | neg                         | neg                         | neg | neg               | neg | neg               | neg | neg              |
| <b>ANA</b>                            | 1/100<br>Homogeneous<br>and speckled | neg | 1/80<br>speckled | 1/100<br>speckled | neg                         | neg                         | neg | 1/100<br>speckled | neg | 1/100<br>speckled | neg | 1/80<br>speckled |
| <b>ANCA</b>                           | neg                                  | neg | neg              | neg               | neg                         | neg                         | neg | neg               | neg | -                 | neg | neg              |
| <b>Anti-RNP<br/>(N&lt;230 cpm)</b>    | 249 cpm                              | neg | neg              | -                 | neg                         | neg                         | neg | -                 | neg | -                 | neg | neg              |
| <b>Anti-SmB<br/>(N&lt;300 cpm)</b>    | 153 cpm                              | neg | neg              | -                 | neg                         | neg                         | neg | -                 | neg | -                 | neg | neg              |
| <b>Anti-SSA Ro<br/>(N&lt;225 cpm)</b> | 852 cpm                              | neg | neg              | -                 | neg                         | neg                         | neg | -                 | neg | -                 | neg | neg              |
| <b>Anti-SSB<br/>(N&lt;180 cpm)</b>    | 151 cpm                              | neg | neg              | -                 | neg                         | neg                         | neg | -                 | neg | -                 | neg | neg              |
| <b>Anti-tissue</b>                    | -                                    | neg | neg              | -                 | Anti-smooth<br>muscle 1/40* | Anti-smooth<br>muscle 1/40* | neg | -                 | neg | -                 | neg | neg              |

Abbreviations: GT, gene therapy; y, years; neg, negative

\*weakly positive, not significant

**Supplementary Table 4.** Antiplatelet antibodies detected after GT.

| Patient ID                         |        | Follow-up after GT (months) | Date of sampling | Platelet count (x10 <sup>9</sup> /L) | Results (MAIPA indirect)                                                                       | Results (Luminex)        |
|------------------------------------|--------|-----------------------------|------------------|--------------------------------------|------------------------------------------------------------------------------------------------|--------------------------|
| <b>Circulating antibodies:</b>     |        |                             |                  |                                      |                                                                                                |                          |
| P2                                 | plasma | 84                          | 23/05/2018       | 47                                   | <b>GP Ia IIa: positive</b><br><b>GP IIb IIIa: positive</b><br><b>GP Ib IX: positive</b>        | negative                 |
|                                    | plasma | 91                          | 14/11/2018       | 57                                   | <b>GP Ia IIa: weakly positive</b><br>GP IIb IIIa: negative<br><b>GP Ib IX: weakly positive</b> | negative                 |
| P4                                 | serum  | 60                          | 18/04/2017       | 18                                   | GP Ia IIa: negative<br>GP IIb IIIa: negative<br>GP Ib IX: negative                             | negative                 |
|                                    | plasma | 72                          | 19/04/2018       | 19                                   | GP Ia IIa: negative<br>GP IIb IIIa: negative<br>GP Ib IX: negative                             |                          |
|                                    | serum  | 78                          | 29/10/2018       | 23                                   | GP Ia IIa: negative<br>GP IIb IIIa: negative<br>GP Ib IX: negative                             | GP Ia IIa: indeterminate |
|                                    | serum  | 84                          | 02/05/2019       | 18                                   | GP Ia IIa: negative<br>GP IIb IIIa: negative<br>GP Ib IX: negative                             | GP Ia IIa: indeterminate |
| P5                                 | plasma | 55                          | 11/01/2017       | 11                                   | GP Ia IIa: negative<br>GP IIb IIIa: negative<br>GP Ib IX: negative                             | negative                 |
| P7                                 | plasma | 58                          | 12/09/2018       | 12                                   | GP Ia IIa: negative<br>GP IIb IIIa: negative<br>GP Ib IX: negative                             | negative                 |
|                                    | plasma | 79                          | 16/09/2020       | 12                                   | GP Ia IIa: negative<br>GP IIb IIIa: negative<br>GP Ib IX: <b>weakly positive</b>               |                          |
| P4's mother                        | serum  | -                           | 02/05/2019       | 238                                  | GP Ia IIa: negative<br>GP IIb IIIa: negative<br>GP Ib IX: negative                             |                          |
| <b>Platelet-bound antibodies :</b> |        |                             |                  |                                      |                                                                                                |                          |
| P2                                 |        | 91                          | 14/11/2018       | 57                                   | GP Ia IIa: negative<br><b>GP IIb IIIa: weakly positive</b><br>GP Ib IX: negative               | -                        |
| P4                                 |        | 78                          | 29/10/2018       | 23                                   | <b>GP Ia IIa: positive</b><br><b>GP IIb IIIa: positive</b><br><b>GP Ib IX: positive</b>        | -                        |
|                                    |        | 84                          | 02/05/2019       | 18                                   | GP Ia IIa: negative<br>GP IIb IIIa: negative<br>GP Ib IX: negative                             | -                        |
| P7                                 |        | 79                          | 16/09/2020       |                                      | GP Ia IIa: negative<br>GP IIb IIIa: indeterminate<br>GP Ib IX: negative                        |                          |
| P4's mother                        |        | -                           | 02/05/2019       | 238                                  | GP Ia IIa: negative<br><b>GP IIb IIIa: weakly positive</b><br>GP Ib IX: negative               | -                        |

Abbreviations: P, patient; WAS, Wiskott-Aldrich syndrome; GT, gene therapy; GP glycoprotein; MAIPA, Monoclonal Antibody-specific Immobilization of Platelet Antigen technique.

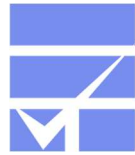

# CONSORT

TRANSPARENT REPORTING of TRIALS

## CONSORT 2010 Flow Diagram

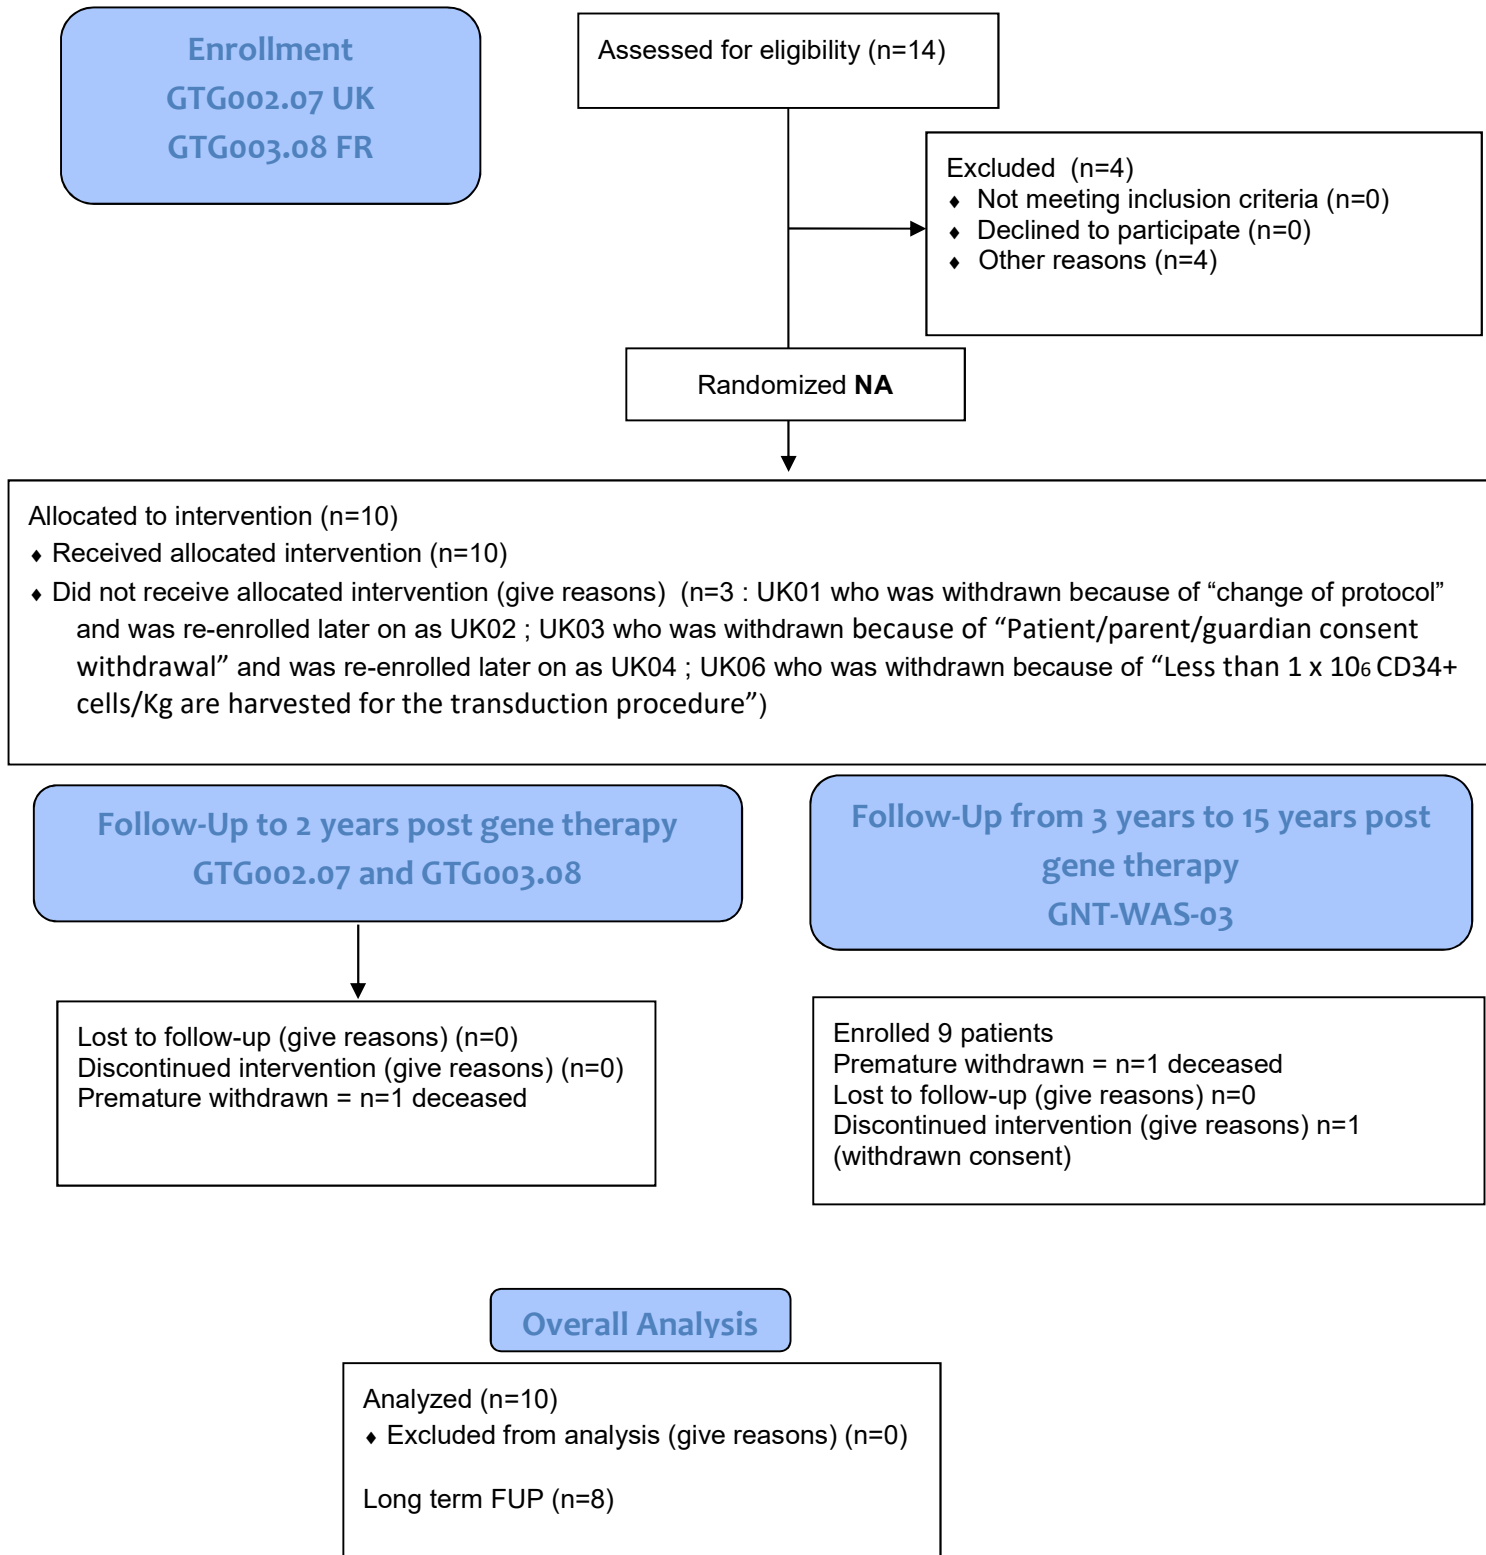

## Date of enrollment

**GTG002.08** authorized on 2010-02-05, completed on 2017-01-09

**GTG002.07** authorized on 2010-01-11, completed on 2019-11-13

**GNT-WAS-03** authorized on 2014-05-14, ongoing
