# Supplementary material for: Long-term safety and efficacy of lentiviral hematopoietic stem/progenitor cell gene therapy for Wiskott–Aldrich syndrome
Source: PubMed Central journal article supplement (PMC8799465; doi:10.1038/s41591-021-01641-x), 2022-01-24

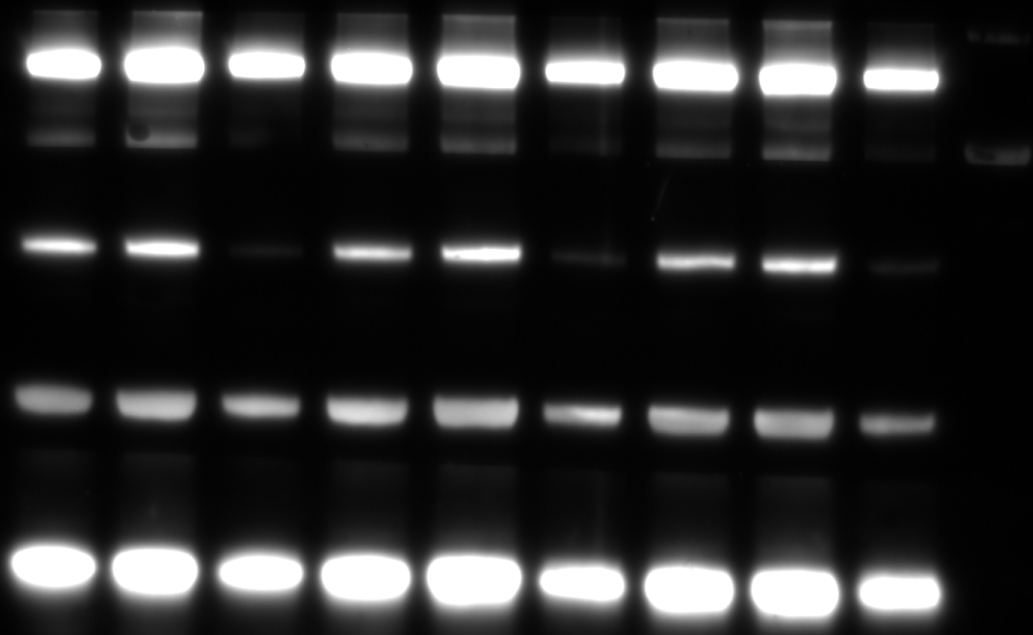

Supplement: 41591_2021_1641_MOESM7_ESM.pdf [file 41591_2021_1641_MOESM7_ESM.pdf]
